# Supplementary material for: High-Throughput Screening Identifies Kinase Inhibitors That Increase Dual Adeno-Associated Viral Vector Transduction In Vitro and in Mouse Retina
Source: PubMed Central journal article supplement (PMC6098407; doi:10.1089/hum.2017.220), 2018-08-01
Supplement: Supp_Fig1.pdf [file Supp_Fig1.pdf]

## Supplementary Data

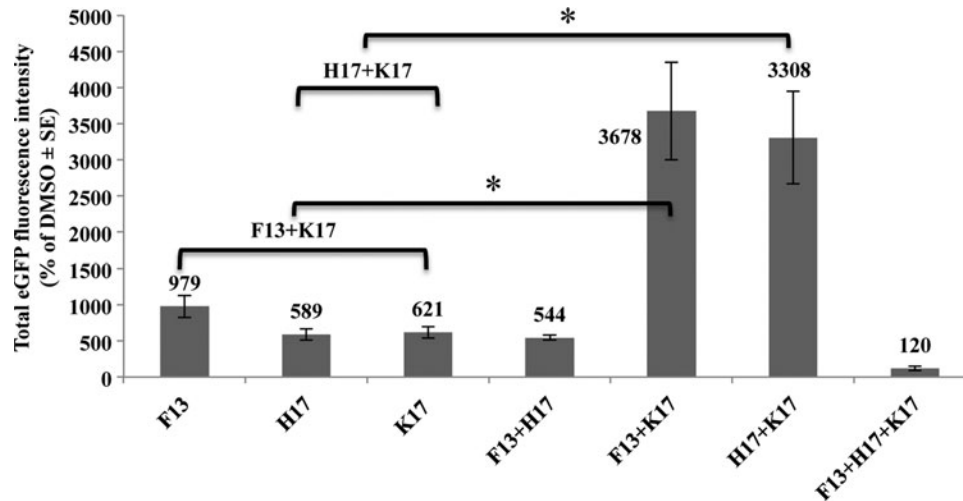

**Supplementary Figure S1.** Synergistic effect of F13 + K17 and H17 + K17. Cytofluorimetric analysis of eGFP expression in HEK293 cells infected with dual AAV2 expressing eGFP and incubated with the various drugs either alone or in combination. Values ( $n=3$ ), normalized to the corresponding DMSO sample, are presented as the mean  $\pm$  SE. Drug concentrations: F13 5  $\mu$ M, H17 3  $\mu$ M, and K17 0.3  $\mu$ M. \* $p \leq 0.05$ . AAV2, dual adeno-associated viral serotype 2; DMSO, dimethyl sulfoxide; eGFP, enhanced green fluorescent protein.
