# Supplementary material for: High-Throughput Screening Identifies Kinase Inhibitors That Increase Dual Adeno-Associated Viral Vector Transduction In Vitro and in Mouse Retina
Source: PubMed Central journal article supplement (PMC6098407; doi:10.1089/hum.2017.220), 2018-08-01
Supplement: Supp_Fig2.pdf [file Supp_Fig2.pdf]

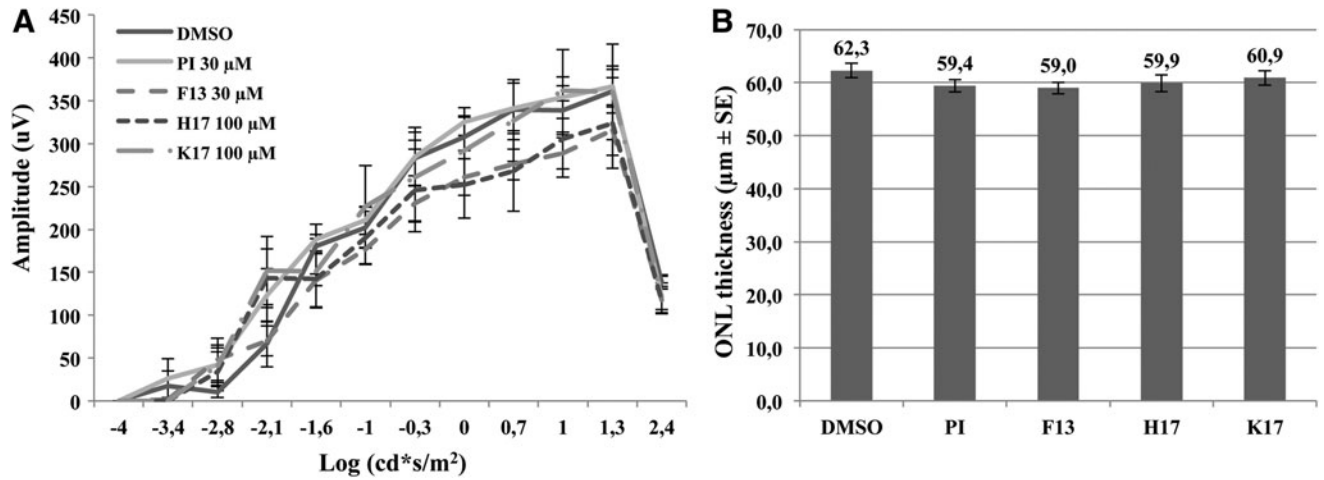

**Supplementary Figure S2.** Absence of detectable toxicity upon sub-retinal administration of dual AAV8 and the kinase inhibitors in mice. **(A and B)** Electroretinographic analysis of a-wave light responses **(A)** and Spectral domain optical coherence tomogram analysis **(B)** of C57BL/6 mice co-injected sub-retinally with dual AAV8 vectors and the indicated drugs. Results ( $n=6$ ) are reported as the mean  $\pm$  SE. Light intensity of 20 cd s/m<sup>2</sup> (a-wave), background white light of 50 cd s/m<sup>2</sup>, and light intensity of 20 cd s/m<sup>2</sup> (b-wave). Drug concentrations: PI 30  $\mu$ M, F13 30  $\mu$ M, H17 100  $\mu$ M, and K17 100  $\mu$ M.
