# Supplementary material for: High-Throughput Screening Identifies Kinase Inhibitors That Increase Dual Adeno-Associated Viral Vector Transduction In Vitro and in Mouse Retina
Source: PubMed Central journal article supplement (PMC6098407; doi:10.1089/hum.2017.220), 2018-08-01
Supplement: Supp_Fig3.pdf [file Supp_Fig3.pdf]

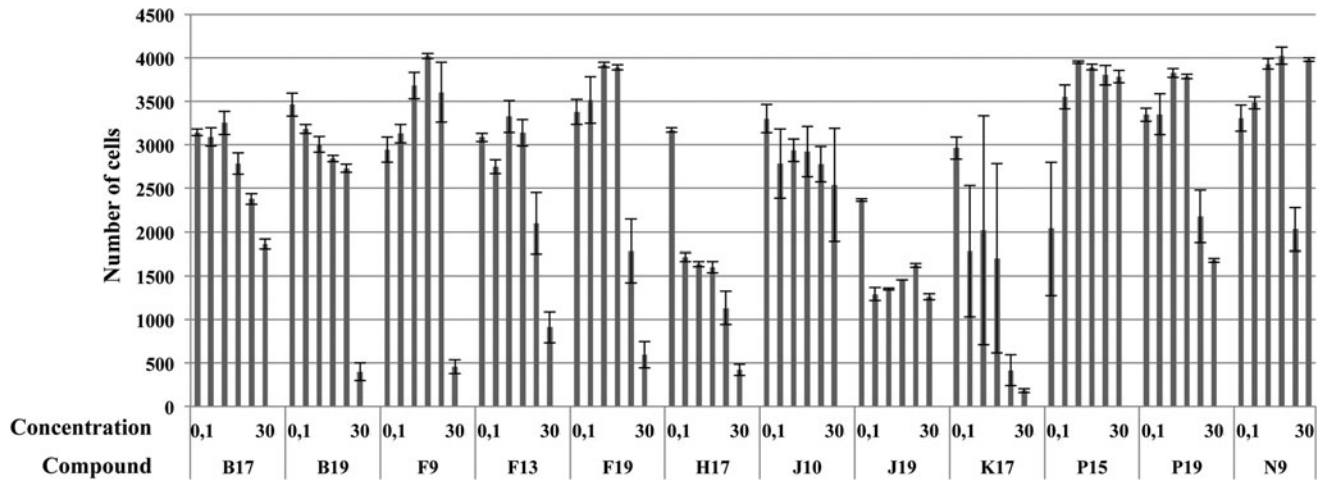

**Supplementary Figure S3.** Cell viability upon exposure to various doses of the kinase inhibitors. HEK293 cells, infected at  $t=24$  h with dual AAV2-eGFP vectors ( $MOI=5 \times 10^4$  each vector), were incubated with the indicated compounds at doses ranging from 0.1 to 30  $\mu M$  (0.1, 0.3, 1, 3, 10, and 30  $\mu M$ ). Surviving cells were counted with the OPERA system 72 h after the treatment. Values ( $n=2$ ) are presented as the mean  $\pm$  SE. MOI, multiplicity of infection.
