# Supplementary material for: High-Throughput Screening Identifies Kinase Inhibitors That Increase Dual Adeno-Associated Viral Vector Transduction In Vitro and in Mouse Retina
Source: PubMed Central journal article supplement (PMC6098407; doi:10.1089/hum.2017.220), 2018-08-01
Supplement: Supp_Fig4.pdf [file Supp_Fig4.pdf]

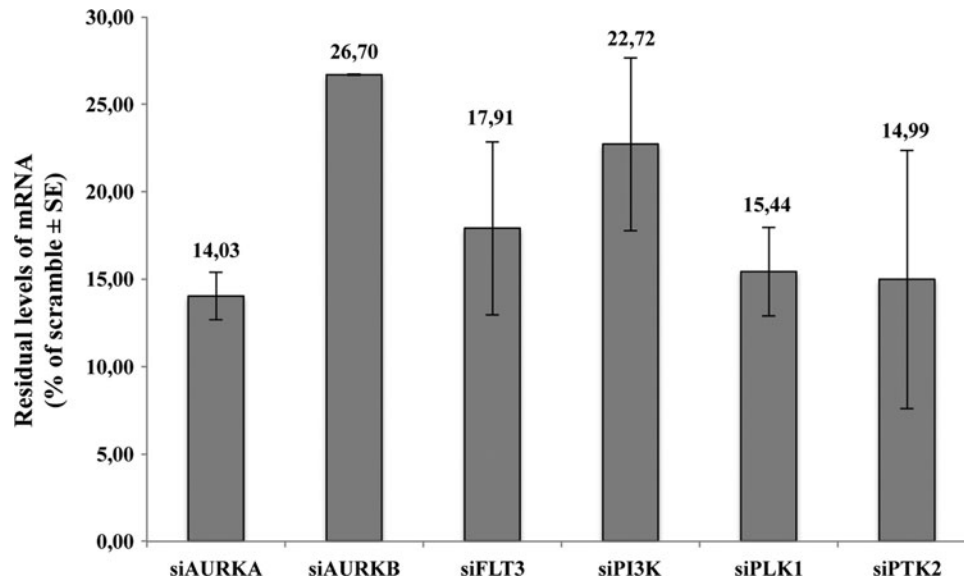

**Supplementary Figure S4.** SiRNA mediated knockdown of the selected kinases. Residual levels of kinase mRNA ( $n=2$ ) were calculated using the  $\Delta\Delta Cq$  formula. Results are expressed as the mean  $\pm$  SE.

---
